# Supplementary material for: Trends in Trauma Admissions During the COVID-19 Pandemic in Los Angeles County, California
Source: PubMed Central journal article supplement (PMC7900857; doi:10.1001/jamanetworkopen.2021.1320), 2021-02-22

## Supplemental Online Content

Ghafil C, Matsushima K, Ding L, Henry R, Inaba K. Trends in trauma admissions during the COVID-19 pandemic in Los Angeles County, California. *JAMA Netw Open*. 2021;4(2):e211320. doi:10.1001/jamanetworkopen.2021.1320

**eTable.** Timeline of COVID-19 Pandemic Within Los Angeles County

**eFigure.** Volume of Admissions to Trauma Centers in Los Angeles County by Year

This supplemental material has been provided by the authors to give readers additional information about their work.

**eTable. Timeline of COVID-19 Pandemic Within Los Angeles County**

| <b>Date</b>      | <b>Event</b>                                                                                               |
|------------------|------------------------------------------------------------------------------------------------------------|
| January 17, 2020 | CDC initiates enhanced screenings at LAX                                                                   |
| January 26, 2020 | LAC confirms first case                                                                                    |
| March 4, 2020    | LAC declares a local health emergency                                                                      |
| March 12, 2020   | Cancellation of all non-essential public events and events on city-owned properties with 50 or more people |
| March 16, 2020   | Closure of Los Angeles Unified School District                                                             |
| March 19, 2020   | Statewide stay-at-home order implemented                                                                   |
| April 14, 2020   | LAC cases top 10,000, with 360 related deaths                                                              |
| May 7, 2020      | Governor announces state will enter stage 2 of its reopening roadmap                                       |
| June 1, 2020     | LAC cases top 60,000                                                                                       |

CDC, Centers for Disease Control and Prevention; LAX, Los Angeles International Airport; LAC, Los Angeles County.

**eFigure. Volume of Admissions to Trauma Centers in Los Angeles County by Year**

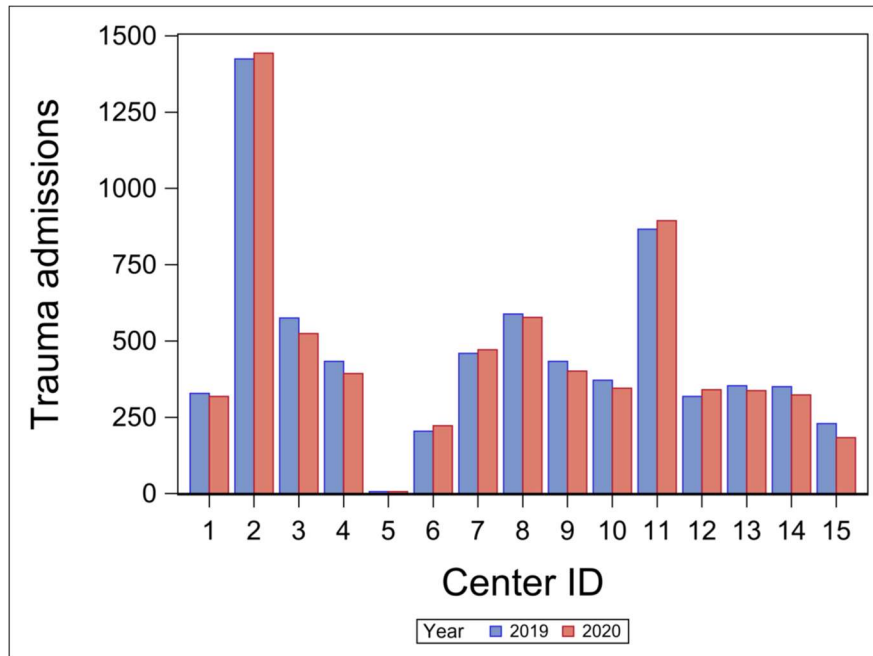

Supplement: jamanetwopen-e211320-s001.pdf [file jamanetwopen-e211320-s001.pdf]
